# Supplementary material for: Dracocephalum moldavica L. Extracts Protect H9c2 Cardiomyocytes against H2O2‐Induced Apoptosis and Oxidative Stress
Source: Hindawi journal article supplement (doi:10.1155/2020/8379358), 2020-01-01
Supplement: f1 [file 8379358.f1.pdf]

## Supplementary Material

### ***Dracocephalum moldavica* L. extracts protect H9c2 cardiomyocytes against H<sub>2</sub>O<sub>2</sub>-induced apoptosis and oxidative stress**

Min Jin<sup>1,2</sup>, Hui Yu<sup>3</sup>, Xia Jin<sup>4</sup>, Lailai Yan<sup>1</sup>, Jingyu Wang<sup>1\*</sup>, and Zhanli Wang<sup>2,3\*</sup>

<sup>1</sup> Center of Medical & Health Analysis, School of Public Health, Peking University, Beijing100191, China

<sup>2</sup> School of Public Health, Baotou Medical College, Baotou 014040, China

<sup>3</sup> Inner Mongolia Key Laboratory of Disease-Related Biomarkers, The Second Affiliated Hospital, Baotou Medical College, Baotou 014040, China

<sup>4</sup> Inner Mongolia Autonomous Region People's Hospital, Hohhot 010010, China

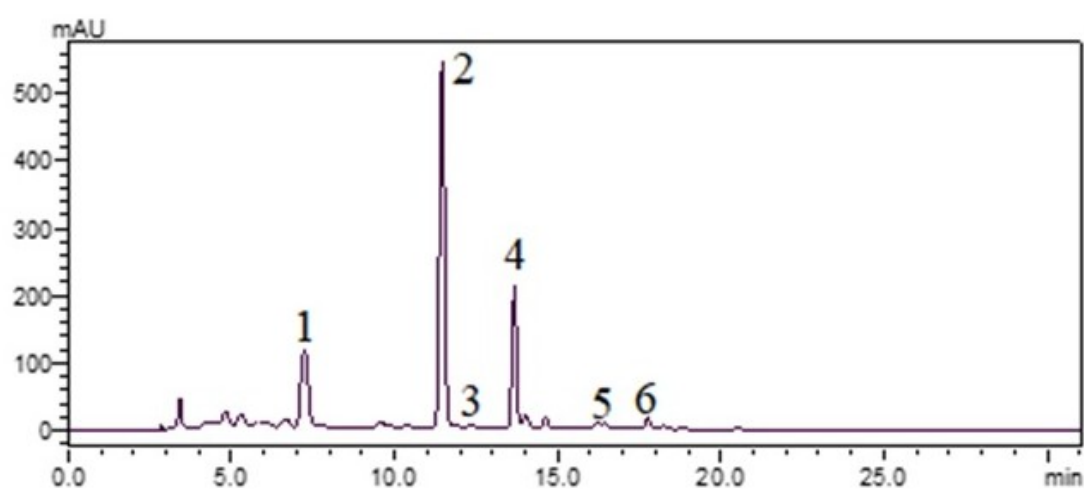

**Figure S1.** HPLC-DAD chromatograms of EtOAc fraction of *D. moldavica* L. ethanol extract, visualized at 330 nm. 1, rosmarinic acid; 2, tilianin; 3, luteolin; 4, an unknown compound; 5, apigenin; 6, disometin.
